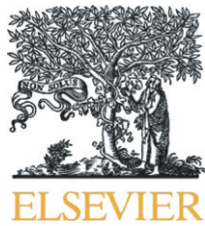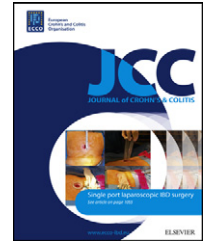

REVIEW ARTICLE

# Improving quality of care in inflammatory bowel disease: What changes can be made today? ☆

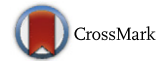

Julián Panés<sup>a,\*</sup>, Marian O'Connor<sup>b</sup>, Laurent Peyrin-Biroulet<sup>c</sup>, Peter Irving<sup>d</sup>, Joel Petersson<sup>e</sup>, Jean-Frédéric Colombel<sup>f</sup>

<sup>a</sup> Hospital Clinic University of Barcelona, IDIBAPS, CIBERehd, Barcelona, Spain

<sup>b</sup> St Mark's Hospital, Harrow, United Kingdom

<sup>c</sup> INSERM Unité 954 and Department of Gastroenterology, University of Lorraine, Nancy, France

<sup>d</sup> Department of Gastroenterology, Guy's and St Thomas' Hospital, London, United Kingdom

<sup>e</sup> Global Medical Affairs Gastroenterology, AbbVie, Rungis, France

<sup>f</sup> Department of Gastroenterology, Mount Sinai School of Medicine, New York, NY, USA

Received 26 November 2013; received in revised form 25 February 2014; accepted 26 February 2014

## KEYWORDS

Inflammatory bowel diseases;  
Crohn disease;  
Ulcerative colitis;  
IBD centres of excellence;  
Multidisciplinary team;  
Quality of care

## Abstract

**Background and aims:** There are a number of gaps in our current quality of care for patients with inflammatory bowel diseases. This review proposes changes that could be made now to improve inflammatory bowel disease care.

**Methods:** Evidence from the literature and clinical experience are presented that illustrate best practice for improving current quality of care of patients with inflammatory bowel diseases.

**Results:** Best care for inflammatory bowel disease patients will involve services provided by a multidisciplinary team, ideally delivered at a centre of excellence and founded on current guidelines. Dedicated telephone support lines, virtual clinics and networking may also provide models through which to deliver high-quality, expert integrated patient care. Improved physician–patient collaboration may improve treatment adherence, producing tangible improvements in disease outcomes, and may also allow patients to better understand the benefits and risks of a disease management plan. Coaching programmes and tools that improve patient self-management and empowerment are likely to be supported by payers if these can be shown to reduce long-term disability.

**Abbreviations:** CRP, C-reactive protein; HCP, healthcare professional; IMID, immune-mediated inflammatory diseases; MDT, multidisciplinary team.

☆ This manuscript summarises the presentations made during the 'Leading Change in IBD' meeting held in Madrid on 18–19 January 2013 and sponsored by AbbVie.

\* Corresponding author at: Department of Gastroenterology, Hospital Clinic of Barcelona, Villarroel 170, 08036 Barcelona, Spain. Tel.: +34 93 2275418; fax: +34 93 2279387.

E-mail address: [jpanes@clinic.cat](mailto:jpanes@clinic.cat) (J. Panés).

*Conclusions:* Halting disease progression before there is widespread bowel damage and disability are ideal goals of inflammatory bowel disease management. Improving patient–physician communication and supporting patients in their understanding of the evidence base are vital for ensuring patient commitment and involvement in the long-term management of their condition. Furthermore, there is a need to create more centres of excellence and to develop inflammatory bowel disease networks to ensure a consistent level of care across different settings.

© 2014 European Crohn's and Colitis Organisation. Published by Elsevier B.V. All rights reserved.

## Contents

|                                                                                           |     |
|-------------------------------------------------------------------------------------------|-----|
| 1. An introductory overview: what can we do better? . . . . .                             | 920 |
| 1.1. Earlier diagnosis, earlier intervention and better adherence to guidelines . . . . . | 920 |
| 1.2. Preventing long-term disease progression . . . . .                                   | 920 |
| 2. What do we do well and what difference has it made? . . . . .                          | 921 |
| 3. Fostering physician–patient collaboration . . . . .                                    | 922 |
| 4. Communicating benefit/risk to patients . . . . .                                       | 922 |
| 5. Working within the healthcare system to improve care . . . . .                         | 923 |
| 6. The future – what needs to be done . . . . .                                           | 924 |
| Conflict of interest . . . . .                                                            | 924 |
| Acknowledgements . . . . .                                                                | 924 |
| References . . . . .                                                                      | 925 |

## 1. An introductory overview: what can we do better?

Inflammatory bowel diseases (IBDs) are emerging as a worldwide epidemic, with prevalence of around 1% in North America and some European countries, and a rapid increase in incidence reported in Asia, China and Australasia.<sup>1</sup> A number of recent reports and publications point to the burden that this rising tide of IBD is imposing on patients, healthcare services and society. For example, a comprehensive and large-scale study in Denmark comparing ulcerative colitis (UC) and Crohn's disease (CD) patients with matched controls has shown that a diagnosis of IBD increases both immediate- and long-term risk of mortality.<sup>2</sup> Furthermore, patients with IBD are more likely to be in receipt of disability allowances than age-matched individuals from the general population,<sup>3</sup> reflecting the impact of an IBD diagnosis on health-related quality of life and productivity.

### 1.1. Earlier diagnosis, earlier intervention and better adherence to guidelines

The IMPACT patient survey, conducted in 27 European countries and sampling responses from almost 5000 IBD patients (63% CD, 33% UC), highlights a number of gaps in current clinical care.<sup>4</sup> Overall, 18% of IBD patients reported that they waited over for 5 years before receiving a diagnosis, and 67% needed emergency care before receiving a diagnosis. Moreover, 53% reported they felt unable to tell their doctor something important at a consultation. Other evidence that suggests that there is room for improvement in the current care of patients with IBD comes from a recent

survey of IBD patients in France.<sup>5</sup> This questionnaire-based study found that, contrary to current guideline recommendations, only around 30% of patients with long-standing extensive colitis received a screening colonoscopy. Furthermore, a US physician survey reported that 29% of physicians were unaware of guidelines recommending venous thromboembolism prophylaxis in hospitalised IBD patients and that only 35% would provide pharmacological prophylaxis to hospitalised patients with severe UC.<sup>6</sup> There is also evidence from population-based studies that many patients are still treated late in the course of their disease, even with current-day treatment algorithms founded on earlier use of immunosuppressants and biological therapy.<sup>7</sup> One of the issues that complicate quality of care is the plethora of guidelines available from a number of professional societies, covering a range of specific scenarios. At least some of these may be rapidly outdated and may be difficult to locate or follow, particularly by non-IBD specialists.

### 1.2. Preventing long-term disease progression

There is a need for wider appreciation of the progressive nature of IBD and the importance of early diagnosis and intervention at earlier stages of disease, ideally before disease progression occurs.<sup>8,9</sup> In CD, there is progressive digestive damage in addition to the characteristic episodes of inflammatory activity, with a growing body of evidence showing that this condition needs to be viewed not simply as series of intermittent flares but as a disease with a continuous pathology<sup>9</sup> (Fig. 1). There are also emerging data to suggest that mucosal healing in CD and UC patients is associated with a reduction in the need for subsequent surgical resection over the following decade.<sup>10</sup> The role of

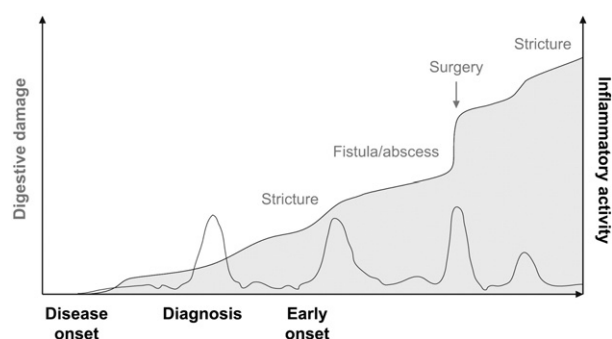

**Figure 1** Progression of digestive damage and inflammatory activity in a theoretical patient with CD. This graphical representation shows that each symptom flare produces cumulative damage to the digestive tract. The role of early treatment in delaying or preventing structural bowel damage and associated disability is an important area of current research. Figure reproduced and adapted from Pariente et al,<sup>42</sup> with permission from Lippincott Williams & Wilkins, Inc. © 2011.

early intense therapy in preventing disease complications and disability is therefore an important area of research.

There is some evidence that patients treated with tumour necrosis factor (TNF) antagonists within the first two years after CD diagnosis will achieve better remission rates than those in whom treatment is started between two and five years or more than five years after diagnosis.<sup>11</sup> Criteria that should prompt early and intensive therapy include extensive CD, severe upper tract disease, severe rectal disease, complicated disease behaviour at diagnosis, complex perianal disease, severe endoscopic lesions and failure to thrive (in paediatric patients). There is hope that the increasing study and use of prognostic and predictive biomarkers may hold a key to improving and tightening patient monitoring, management and disease control. For example, C-reactive protein (CRP) levels appear to be predictive of level of response to biologic therapy.<sup>12</sup> There are a number of on-going clinical trials, including the CALM (NCT01235689) and REACT-2 (NCT01698307) studies, that hope to determine the value of early and tight disease control on clinical outcomes in CD. For patients on treatment, there is also a need for consistent and agreed approaches to managing loss of response, founded on disease and drug monitoring protocols and algorithms that ensure appropriate treatment intensification or treatment switching, according to patient needs.<sup>13–16</sup>

## 2. What do we do well and what difference has it made?

The best care for patients with IBD appears to come from services provided by a multidisciplinary team (MDT) (Table 1), ideally delivered at an IBD centre of excellence and founded on current consensus.<sup>17–19</sup> High-volume IBD centres have been shown to provide better surgical outcomes than non-specialist centres.<sup>20</sup> Care delivered by a MDT at an IBD centre of excellence offers an effective model for long-term care of patients with IBD and reflects

**Table 1** Suggested composition of an inflammatory bowel disease multidisciplinary team.

|                    |                                                                                                                                                            |
|--------------------|------------------------------------------------------------------------------------------------------------------------------------------------------------|
| Core team          | Gastroenterologists<br>IBD nurse specialists<br>Surgeons<br>Radiologists<br>Pathologists<br>Specialist pharmacists                                         |
| Complementary team | Dieticians<br>Psychologists<br>Social workers<br>Paediatricians<br>Rheumatologists<br>Dermatologists<br>Ophthalmologists<br>Infectious disease specialists |

the need to be adaptable and responsive to patients with changeable and progressive disease.

At St Mark's Hospital in London, the IBD team comprises 15 gastroenterologists, 10 surgeons and five specialist nursing teams (including an IBD nursing team, stoma and pouch nurses, nutrition nurses and an endoscopy nursing team), as well as pharmacy, radiology, paediatrics and clinical research. Weekly IBD MDT meetings take place, including a main IBD MDT meeting, a virtual biologics meeting, a dysplasia/polyp meeting, a psychosocial meeting and an IBD executive meeting (for the purposes of service planning). The IBD MDT meeting allows for MDT consideration of complex patients and/or diagnostic dilemmas to create a clear care plan. The virtual biologics meeting is designed to ensure a consistent approach to treatment and monitoring for patients receiving anti-TNF therapy. The patient's general practitioner and the relevant funding body are also provided with an update on the patient's progress to ensure that treatment continues without interruption. Meetings are documented to allow appropriate correspondence regarding clinical decisions to general practitioners and patients. Patients with chronic diseases such as IBD need to learn self-management while having a supportive network and access to prompt care and advice when unwell. The IBD specialist nurse plays a key liaison role with the patient, acting as their advocate at MDT meetings and ensuring that the focus is on managing IBD in the context of the patient's life, rather than just in terms of disease activity. Specialist nurses are a key point of access for patients for education and information and are also a means for patients to share and discuss the impact of disease on everyday life, specific symptom difficulties and the complexities of living with a somewhat "invisible" disease.<sup>21</sup> What IBD patients want from nurses is to be listened to, and to be given information, honest dialogue about their disease, a relationship or connection and hope of a more normal life. A continuing focus of nurses is to determine a patient's ability to manage their illness in the context of their life, by listening to and supporting patients and providing care and information according to individual patient needs. Providing a dedicated IBD telephone line for patients is an example of a tool that allows swift appropriate access to advice and care,

particularly during periods of ill-health.<sup>22</sup> Virtual clinics and networking may also provide models through which to deliver high-quality, expert integrated patient care in IBD.<sup>23</sup>

IBD centres of excellence may not be the norm for IBD care in every jurisdiction. For example, very few countries allocate specialist nursing staff as permanent personnel in IBD units. Nevertheless, this kind of model can provide us with opportunity to evaluate best-practice strategies and tailor these to other contexts as resources allow.

### 3. Fostering physician–patient collaboration

Fostering collaboration between the patient and their healthcare team is particularly important in terms of optimising treatment adherence. Patients need to accept the need for a therapeutic intervention, then adhere and persist with that intervention, in order to succeed in reaching the goals of remission, prevention of damage and prevention of physical disability. The motivation to start and continue on a medication is known to be influenced by how patients judge their personal need for medication relative to their concerns about potential adverse events.<sup>24</sup> A cross-sectional survey of 1871 members of the National Association for Colitis and CD in the UK highlighted that acceptance of the need for a treatment is the primary challenge to adhering to maintenance treatment.<sup>25</sup> The literature provides a number of reports showing that patients with IBD struggle to adhere to their prescribed medication over time. For example, while more than 90% of CD patients reported good adherence to thiopurine therapy at 3 months,<sup>26</sup> another study found that only 26% of patients reported adhering to their prescribed therapy after 4 years.<sup>27</sup> A systematic review of 13 observational studies of adherence to anti-TNF therapy in IBD found a pooled treatment adherence rate of 83% (37–96%) with lower adherence rates in UC than in CD.<sup>28</sup> Often poor adherence is unintentional (such as forgetting to take medication or taking medication incorrectly) and is therefore preventable. Sometimes, however, adherence is intentional with strong predictors of intentional non-adherence which include concerns about treatment side effects, beliefs about illness, the perceived need for treatment and perceptions regarding treatment efficacy (Table 2).<sup>29</sup> Even intentional non-adherence can be reduced by addressing patient misconceptions or beliefs about the disease and its

treatments. In the UK, the National Institute for Health and Clinical Excellence guidelines on medicine adherence stress that patient involvement is key to improving adherence (Fig. 2).<sup>30</sup> Furthermore, a meta-analysis has shown that healthcare professional (HCP) communication significantly and positively correlates with improved patient adherence.<sup>31</sup> Physician training in communication skills increased adherence significantly and pre-treatment elicitation of concerns predicted subsequent adherence. Programmes that include motivational interviewing (described by Miller and Rollnick<sup>32</sup> as “...a collaborative, conversation style for strengthening a person's own motivation and commitment to change” [p. 12]) could help encourage improved understanding of disease and treatment, better appreciation of risks versus benefits and ultimately improved adherence to therapy and monitoring. Cost of treatment in relation to income may also be a factor impacting adherence to treatment,<sup>29</sup> although little investigation has been performed around this determinant in the IBD context. Addressing this barrier to treatment requires the participation of health system engineers, payers, patient groups and, of course, the IBD treatment industry.

More research is needed into why patients with immune-mediated inflammatory diseases (IMIDs) have treatment adherence difficulties. The ALIGN study (UKRN ID: 12782) is a multinational cross-sectional study to determine patient-specific and general beliefs in patients with IMIDs; 7300 patients with one of six diagnoses will be assessed in 35 countries. ALIGN will use a validated questionnaire to collect data on beliefs and concerns that will be correlated with disease and treatment history.

### 4. Communicating benefit/risk to patients

Patients who understand the benefits and risks of a disease management plan are likely to be more accepting of it and willing to share in and follow their treatment and monitoring schedules. In addition, a study in patients with CD has shown that patients are willing to trade risks incurred by therapies for benefits associated with their use.<sup>33</sup> Patients completed choice-format conjoint trade-off tasks involving hypothetical treatments with varying efficacy and risk levels. Benefits and risks were described in terms of daily symptoms and activity limitations, serious complications of CD, time between flare-ups, exposure to steroids and risk of serious adverse events known to be associated with CD treatment (for example, progressive multifocal leukoencephalopathy, serious infections and lymphoma). Patients were willing to accept elevated risks in exchange for clinical efficacy, interestingly at an order of magnitude greater than those known to be associated with IBD drug therapy. However, communicating risks and benefits to patients is not necessarily easy as one cannot assume that the patient has an ability to understand even simple statistical terms. In addition, the way that risks and benefits are presented can be misinterpreted by the patient. For example, in a study at a US tertiary care centre, patients asked to choose between two equally efficacious drugs – drug R (said to decrease relative risk of death by 80%) and drug A (said to prevent eight deaths in 100 people) – were more likely to choose drug R.<sup>34</sup> In addition, “denominator neglect” can lead to

**Table 2** Top reasons for medication non-fulfilment and non-persistence in patients with chronic disease in the USA.<sup>29</sup> Survey participants were selected from the Harris Interactive Chronic Illness Panel. Of the 19,794 respondents eligible for the non-persistence analysis, 2756 reported non-persistence for at least one prescription in the previous year and were included in the analysis.

|                                                     |
|-----------------------------------------------------|
| Financial hardship                                  |
| Fear or experience of side effects                  |
| Generic concerns about medications                  |
| Lack of perceived need for medication               |
| Change in health insurance or drug benefits         |
| Did not believe that condition was life-threatening |



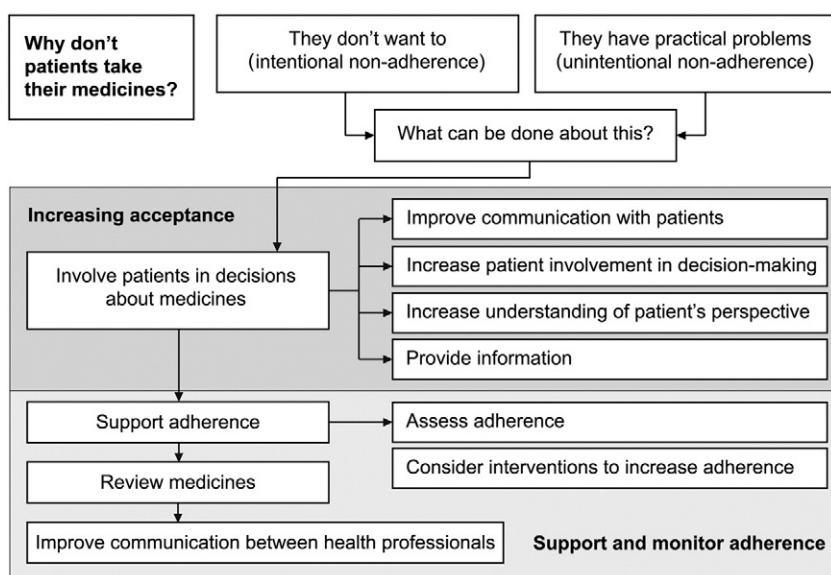

**Figure 2** Summary of the UK National Institute for Health and Clinical Excellence care pathway for supporting treatment adherence in patients with chronic diseases.<sup>30</sup> The recommendations highlight the importance of patient involvement in making decisions about medicines as a key to increasing acceptance.

over- or under-estimation of benefit or risk.<sup>35</sup> Therefore, it is important to present patients with data in a consistent statistical format to allow them to make valid comparisons. This means using absolute rather than relative risk, using the same denominator across different scenarios, explaining percentages as fractions and avoiding inaccurate terms.<sup>36</sup> Icon arrays can be very helpful in illustrating benefit and risk data (Fig. 3) and graphical depiction may be helpful depending on a patient's graph literacy skills.<sup>35–37</sup> The future of communicating risks and benefits may lie in system dynamics modelling where data are collected on the disease course and its alteration by different treatments, and then personalised to the patient based on a number of demographic and phenotypic inputs and presented in an easily understood graphical format.<sup>36</sup>

## 5. Working within the healthcare system to improve care

Payers have a vested interest in ensuring that patients with IBD receive optimal early care with a goal of reducing long-term disease progression and disability. Nevertheless, earlier care may have a more immediate cost associated with it. State healthcare providers face the challenge of achieving the best health outcomes from available funding across whole populations and may, therefore, be more concerned with treatment than prevention. Healthcare funds in the European Union typically operate within the Association Internationale de la Mutualité (AIM: a 46 member mutual comprising 25 countries and reflecting 85% of

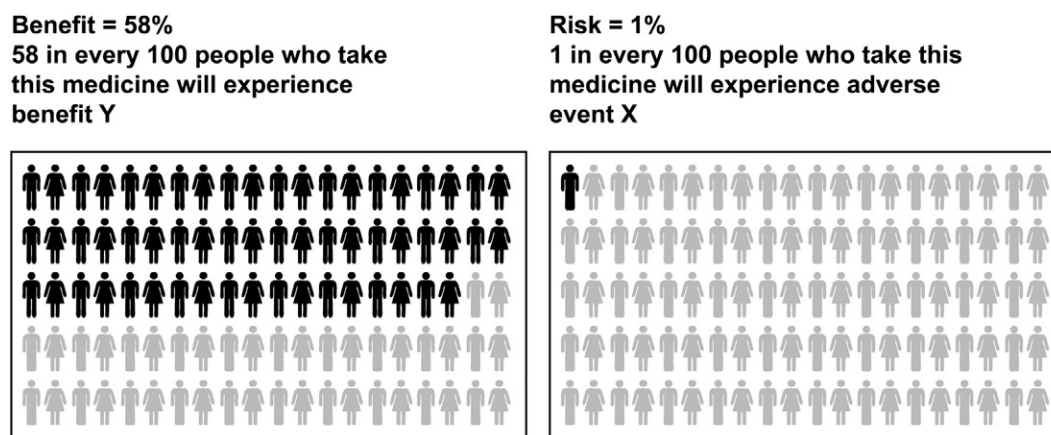

**Figure 3** An example of a simple icon array to illustrate and explain treatment benefit and risk data to patients. Arrays with 1000 or 10,000 patients can be used to indicate percentages <1%.

members of the EU) or the European Social Insurance Platform (ESIP). These mutuals in health insurance work together in their approach to chronic clinical conditions by seeking the most effective means of reimbursement of care costs. Furthermore, they are supportive of new models of care that recognise that the societal costs of chronic diseases are impacted by measures that target prevention, individualise care, reduce hospitalisations and limit disability. AIM strives towards integrated customised care – that is, efficient care that integrates primary and secondary care services, considers service packages and medical and social care, and is customised to focus on lifetime periods and risk management as well as on individual case management needs. Integrated services are supportive of early disease diagnosis and the re-use of data to help predictive modelling and enrolment of patients into care schemes. Health payers are also supportive of coaching programmes and tools that improve patient self-management and empowerment (such as electronic personal health records). Such measures may be used in pay-for-performance programmes. Improvement in the care of patients with chronic disease is possible by creating both political and healthcare service structures that are willing, ready and able to deliver new services offering earlier diagnosis and treatment. Payers are important stakeholders and only by integrating patient and payer perspectives can the burden of chronic diseases be efficiently and effectively tackled.

## 6. The future — what needs to be done

In the future, developments in disease phenotyping and genotyping may help inform earlier intervention. A plethora of new and emerging therapeutic agents and interventions affected through differing mechanisms of action should also help improve future management of IBD.<sup>38</sup> Improving patient–physician communication and supporting patients in their understanding of the evidence base are also important for ensuring patient commitment and involvement in the long-term management of their condition.<sup>39–41</sup> There is also a desire to create more IBD centres of excellence and to develop IBD networks to ensure a consistent level of care across different settings – working alone is no longer acceptable. Finally, improved communication may hold the key to empowering and allowing patients to actively participate in disease management.

However, as with pharmacological interventions, quality interventions also need evaluated on evidence. While structure and process measures, such as those described in this paper, improve the care that we give to our patients with IBD, the tangible impact of these strategies on disease outcomes has yet to be clearly established. Robust reporting systems need to be implemented so that we can evaluate whether changes in structure and process definitively drive better meaningful clinical outcomes. Furthermore, the cost-effectiveness of such measures needs to be carefully considered, particularly in the current economic climate, which is characterised by the disintegration of social security systems due to austerity measures. It is likely that quality of care and accessibility to treatment will continue to be a primary focus for professional and patient associations

across the world as we strive to improve outcomes for our patients with IBD.

## Conflict of interest

Dr Panés has received speaker fees from AbbVie, MSD, Shire Pharmaceuticals and UCB; acted as a scientific consultant for AbbVie, Actelion, Boehringer Ingelheim, Bristol-Myers Squibb, Ferring, Genentech, Janssen, MSD, Novartis, Nutrition Science Partners, Pfizer, Shire Pharmaceuticals, Tygenics and UCB Pharma; and received research grants from AbbVie and MSD.

Ms O'Connor has received speaker fees from AbbVie, MSD and Warner Chilcott. She has also received consultancy fees from AbbVie, MSD and Vifor Pharma.

Professor Peyrin-Biroulet has received consulting and/or lecture fees from AbbVie, Boehringer Ingelheim, Bristol-Myers Squibb, Ferring, Genentech, Hospira, Janssen, Merck, Mitsubishi, Norgine, Pharmacosmos, Pilege, Shire Pharmaceuticals, Takeda, Therakos, Tillotts Pharma, UCB Pharma and Vifor Pharma.

Dr Irving has received speaker fees from AbbVie, MSD, Warner Chilcott, Ferring and Shire Pharmaceuticals. He has received consultancy fees from AbbVie, Pharmacosmos, Genentech, MSD, Shire Pharmaceuticals and Warner Chilcott.

Dr Petersson is an employee of and shareholder in AbbVie.

Professor Colombel has received consulting and/or lecture fees from AbbVie, ActoGeniX, Albireo Pharma, Amgen, AstraZeneca, Bayer AG, Biogen Idec, Boehringer Ingelheim GmbH, Bristol-Myers Squibb, Cellerix, Centocor, Chemo Centryx, Cosmo Technologies, Danone Research, Elan Pharmaceuticals, Genentech, Giuliani SpA, Given Imaging, GlaxoSmithKline, Hutchison MediPharma, MSD, Millennium Pharmaceuticals Inc. (now Takeda), Neovacs, Ocera Therapeutics Inc., Otsuka America Pharmaceutical, Pfizer, Shire Pharmaceuticals, Prometheus Laboratories, Sanofi-Aventis, Schering-Plough, Synta Pharmaceuticals Corp., Teva, Therakos, Tillotts Pharma, UCB Pharma and Wyeth, and has stock ownership in Intestinal Biotech Development, Lille, France.

## Acknowledgements

This manuscript summarises the presentations made by Jean-Frédéric Colombel, Marian O'Connor, Jan van Emelen (Independent Health Insurance Funds, Brussels, Belgium), Laurent Peyrin-Biroulet and Peter Irving at the Leading Change in IBD meeting, held in Madrid on 18–19 January 2013, which was sponsored by AbbVie. AbbVie provided funding to Lucid, Burleighfield House, Buckinghamshire, UK, to manage the Leading Change in IBD meeting, for which AbbVie provided topic ideas and participated in the development of the meeting content. AbbVie paid consultancy fees to Julián Panés, Jean-Frédéric Colombel, Marian O'Connor, Jan van Emelen, Laurent Peyrin-Biroulet and Peter Irving for their participation in the meeting, and travel to and from the meeting was reimbursed. This manuscript reflects the opinions of the authors and each author reviewed the manuscript at all stages of development to ensure that it accurately reflects the content of their presentation. Joel

Petersson, an employee of AbbVie, is an author of this manuscript and was involved in the development and review of the manuscript with the authors and the medical writer. The authors determined the final content, and all authors read and approved the final manuscript. The authors maintained complete control over the content of the paper. No payments were made to the authors for the writing of this manuscript.

Juliette Allport, Sian Kneller and Winnie McFadzean of Leading Edge (part of the Lucid Group), Burleighfield House, Buckinghamshire, UK provided medical writing and editorial support to the authors in the development of this manuscript. From slides provided by the authors and the audio recording of the meeting, Leading Edge prepared a draft outline manuscript for author comment and approval. Leading Edge subsequently supported the incorporation of comments into the final draft for author approval, and editorial styling required by the journal. The financial support to Leading Edge for medical writing and editorial assistance was provided by AbbVie.

Dr Jan van Emelen provided the original content for his presentation at the meeting, which was used in the development of the manuscript.

## References

- Molodecky NA, Soon IS, Rabi DM, Ghali WA, Ferris M, Chernoff G, et al. Increasing incidence and prevalence of the inflammatory bowel diseases with time, based on systematic review. *Gastroenterology* 2012;142:46–54.
- Jess T, Frisch M, Simonsen J. Trends in overall and cause-specific mortality among patients with inflammatory bowel disease from 1982 to 2010. *Clin Gastroenterol Hepatol* 2013;11:43–8.
- Hoivik ML, Moum B, Solberg IC, Henriksen M, Cvancarova M, Bernklev T, et al. Work disability in inflammatory bowel disease patients 10 years after disease onset: results from the IBSEN Study. *Gut* 2013;62:368–75.
- Wilson B, Lonnfors S, Hommes DW, Vermeire S, Greco M, Bell C, et al. A European Crohn's and ulcerative colitis patient life IMPACT survey. Eighth Congress of the European Crohn's and Colitis Organisation; 2013. [Abstract P406. Available at: <https://www.ecco-ibd.eu/publications/congress-abstract-s/item/p06-a-euro.html>].
- Vienne A, Simon T, Cosnes J, Baudry C, Bouhnik Y, Soule JC, et al. Low prevalence of colonoscopic surveillance of inflammatory bowel disease patients with longstanding extensive colitis: a clinical practice survey nested in the CESAME cohort. *Aliment Pharmacol Ther* 2011;34:188–95.
- Tinsley A, Naymagon S, Trindade AJ, Sachar DB, Sands BE, Ullman TA. A survey of current practice of venous thromboembolism prophylaxis in hospitalized inflammatory bowel disease patients in the United States. *J Clin Gastroenterol* 2013;47:e1–6.
- Bouguen G, Peyrin-Biroulet L. Surgery for adult Crohn's disease: what is the actual risk? *Gut* 2011;60:1178–81.
- Cosnes J, Cattan S, Blain A, Beaugerie L, Carbonnel F, Parc R, et al. Long-term evolution of disease behavior of Crohn's disease. *Inflamm Bowel Dis* 2002;8:244–50.
- Schoepfer AM, Dehlavi MA, Fournier N, Safroneeva E, Straumann A, Pittet V, et al. IBD Cohort Study Group. Diagnostic delay in Crohn's disease is associated with a complicated disease course and increased operation rate. *Am J Gastroenterol* 2013;108:1744–53.
- Solberg IC, Lygren I, Jahnsen J, Vatn MH, Moum B. Mucosal healing after initial treatment may be a prognostic marker for long-term outcome in inflammatory bowel disease. *Gut* 2008;57 [Abstract A15].
- Schreiber S, Reinisch W, Colombel JF, Sandborn WJ, Hommes DW, Robinson AM, et al. Subgroup analysis of the placebo-controlled CHARM trial: increased remission rates through 3 years for adalimumab-treated patients with early Crohn's disease. *J Crohns Colitis* 2013;7:213–21.
- Jurgens M, Mahachie John JM, Cleynen I, Schnitzler F, Fidler H, van Moerkercke W, et al. Levels of C-reactive protein are associated with response to infliximab therapy in patients with Crohn's disease. *Clin Gastroenterol Hepatol* 2011;9:421–7.
- Bendtsen K, Ainsworth M, Steenholdt C, Thomsen OO, Brynskov J. Individual medicine in inflammatory bowel disease: monitoring bioavailability, pharmacokinetics and immunogenicity of anti-tumour necrosis factor- $\alpha$  antibodies. *Scand J Gastroenterol* 2009;44:774–81.
- Afif W, Loftus Jr EV, Faubion WA, Kane SV, Bruining DH, Hanson KA, et al. Clinical utility of measuring infliximab and human anti-chimeric antibody concentrations in patients with inflammatory bowel disease. *Am J Gastroenterol* 2010;105:1133–9.
- Rutgeerts P, Vermeire S, Van Assche G. Predicting the response to infliximab from trough serum levels. *Gut* 2010;59:7–8.
- Ben-Horin S, Yavzori M, Katz L, Kopylov U, Picard O, Fudim E, et al. The immunogenic part of infliximab is the F(ab')<sub>2</sub>, but measuring antibodies to the intact infliximab molecule is more clinically useful. *Gut* 2011;60:41–8.
- Rahier JF, Ben-Horin S, Chowers Y, Conlon C, De Munter P, D'Haens G, et al. European evidence-based Consensus on the prevention, diagnosis and management of opportunistic infections in inflammatory bowel disease. *J Crohns Colitis* 2009;3:47–91.
- Ricci C, Lanzarotto F, Lanzini A. The multidisciplinary team for management of inflammatory bowel diseases. *Dig Liver Dis* 2008;40(Suppl 2):S285–8.
- Mawdsley JE, Irving PM, Makins RJ, Rampton DS. Optimizing quality of outpatient care for patients with inflammatory bowel disease: the importance of specialist clinics. *Eur J Gastroenterol Hepatol* 2006;18:249–53.
- Kaplan GG, McCarthy EP, Ayanian JZ, Korzenik J, Hodin R, Sands BE. Impact of hospital volume on postoperative morbidity and mortality following a colectomy for ulcerative colitis. *Gastroenterology* 2008;134:680–7.
- Whayman K. Supporting and educating patients. In: Whayman K, Duncan J, O'Connor M, editors. *Inflammatory bowel disease nursing*. London: MA Healthcare Ltd; 2011. p. 333–57.
- O'Connor M. Criteria for success using an inflammatory bowel disease nurse telephone service. *Gastrointest Nurs* 2011;9:35–40.
- Irving P. The future developments in inflammatory bowel disease care. *Frontline Gastroenterol* 2012;3:i42–6.
- Horne R, Cooper V, Gellaitry G, Date HL, Fisher M. Patients' perceptions of highly active antiretroviral therapy in relation to treatment uptake and adherence: the utility of the necessity-concerns framework. *J Acquir Immune Defic Syndr* 2007;45:334–41.
- Horne R, Parham R, Driscoll R, Robinson A. Patients' attitudes to medicines and adherence to maintenance treatment in inflammatory bowel disease. *Inflamm Bowel Dis* 2009;15:837–44.
- Bokemeyer B, Teml A, Roggel C, Hartmann P, Fischer C, Schaeffeler E, et al. Adherence to thiopurine treatment in out-patients with Crohn's disease. *Aliment Pharmacol Ther* 2007;26:217–25.
- Mantzaris GJ, Roussos A, Kalantzis C, Koilakou S, Raptis N, Kalantzis N. How adherent to treatment with azathioprine are

- patients with Crohn's disease in long-term remission? *Inflamm Bowel Dis* 2007;13:446–50.
28. Lopez A, Billioud V, Peyrin-Biroulet C, Peyrin-Biroulet L. Adherence to anti-TNF therapy in inflammatory bowel diseases: a systematic review. *Inflamm Bowel Dis* 2013;19:1528–33.
  29. McHorney CA, Spain CV. Frequency of and reasons for medication non-fulfillment and non-persistence among American adults with chronic disease in 2008. *Health Expect* 2011;14:307–20.
  30. National Institute for Health and Clinical Excellence. Medicines adherence: involving patients in decisions about prescribed medicines and supporting adherence. NICE clinical guideline, 76. Manchester: National Institute for Health and Clinical Excellence; 2009.
  31. Zolnieriek KB, Dimatteo MR. Physician communication and patient adherence to treatment: a meta-analysis. *Med Care* 2009;47:826–34.
  32. Miller WR, Rollnick S. Motivational interviewing: helping people change. Third ed. New York, NY: Guilford Press; 2013.
  33. Johnson FR, Ozdemir S, Mansfield C, Hass S, Miller DW, Siegel CA, et al. Crohn's disease patients' risk-benefit preferences: serious adverse event risks versus treatment efficacy. *Gastroenterology* 2007;133:769–79.
  34. Malenka DJ, Baron JA, Johansen S, Wahrenberger JW, Ross JM. The framing effect of relative and absolute risk. *J Gen Intern Med* 1993;8:543–8.
  35. Garcia-Retamero R, Okan Y, Cokely ET. Using visual aids to improve communication of risks about health: a review. *Sci World J* 2012;2012:562637.
  36. Siegel CA, Siegel LS, Hyams JS, Kugathasan S, Markowitz J, Rosh JR, et al. Real-time tool to display the predicted disease course and treatment response for children with Crohn's disease. *Inflamm Bowel Dis* 2011;17:30–8.
  37. Galesic M, Garcia-Retamero R, Gigerenzer G. Using icon arrays to communicate medical risks: overcoming low numeracy. *Health Psychol* 2009;28:210–6.
  38. Danese S. New therapies for inflammatory bowel disease: from the bench to the bedside. *Gut* 2012;61:918–32.
  39. Baars JE, Markus T, Kuipers EJ, van der Woude CJ. Patients' preferences regarding shared decision-making in the treatment of inflammatory bowel disease: results from a patient-empowerment study. *Digestion* 2010;81:113–9.
  40. Elkjaer M, Shuhaibar M, Burisch J, Bailey Y, Scherfig H, Laugesen B, et al. E-health empowers patients with ulcerative colitis: a randomised controlled trial of the web-guided 'Constant-care' approach. *Gut* 2010;59:1652–61.
  41. World Health Organization. Adherence to long-term therapies: evidence for action. Geneva: World Health Organization; 2003.
  42. Pariente B, Cosnes J, Danese S, Sandborn WJ, Lewin M, Fletcher JG, et al. Development of the Crohn's disease digestive damage score, the Lémann score. *Inflamm Bowel Dis* 2011;17:1415–22.
